# Supplementary material
Source: Springer Nature journal article supplement (https://www.springermedizin.de/resource/supplementary/13256_2011_1915_MOESM3_ESM.pdf/9648730)

**A**

[F4]

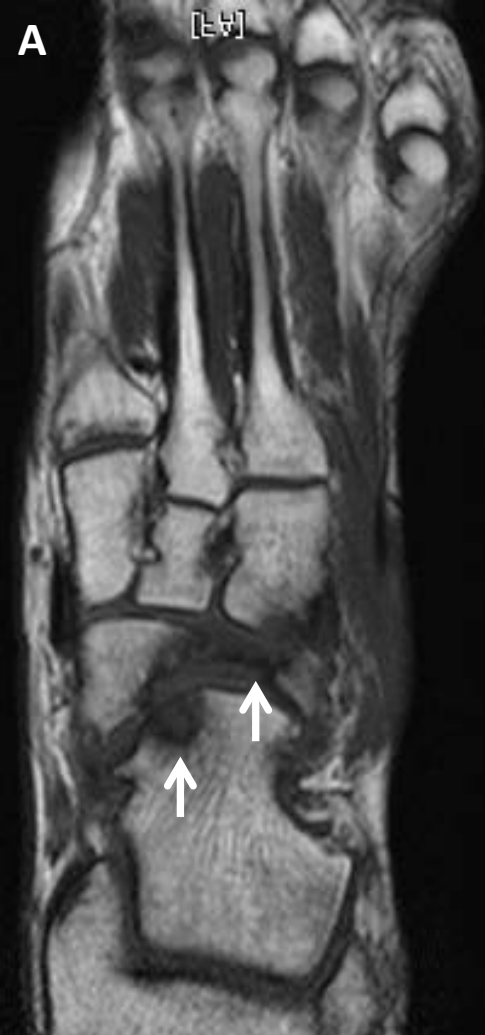**B**

[FA]

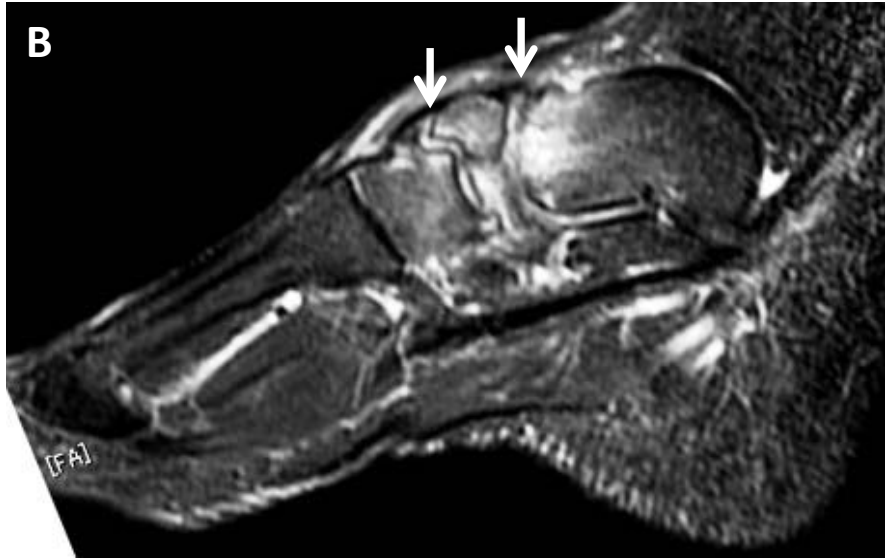

Supplement: MOESM3 [file 9648730]
